# Supplementary material for: Exploring the metabolic biomarkers and pathway changes in crucian under carbonate alkalinity exposure using high-throughput metabolomics analysis based on UPLC-ESI-QTOF-MS
Source: Royal Society of Chemistry journal article supplement (doi:10.1039/c9ra08090b), 2020-01-01
Supplement: c9ra08090b1.pdf [file c9ra08090b1.pdf]

**Table S1** Significant biomarkers of differentially expressed metabolites in crucian under CA exposures using high-throughput metabolomics analysis based on UPLC-ESI-QTOF-MS

| No. | Ion mode | Rt(min) | Name                  | Formula                                                      | m/z    | error   | HMDB        |
|-----|----------|---------|-----------------------|--------------------------------------------------------------|--------|---------|-------------|
| 1   | M-H      | 0.98    | L-Leucine             | C <sub>6</sub> H <sub>13</sub> NO <sub>2</sub>               | 130.09 | -3.9741 | HMDB00687   |
| 2   | M-H      | 7.23    | Arachidonic acid      | C <sub>20</sub> H <sub>32</sub> O <sub>2</sub>               | 303.23 | 1.2435  | HMDB01043   |
| 3   | M-H      | 4.50    | Cer(d18:0/18:0)       | C <sub>36</sub> H <sub>73</sub> NO <sub>3</sub>              | 566.55 | -2.3542 | HMDB11761   |
| 4   | M+H      | 0.96    | Citric acid           | C <sub>6</sub> H <sub>8</sub> O <sub>7</sub>                 | 215.02 | -4.5676 | HMDB00094   |
| 5   | M-H      | 6.39    | Corticosterone        | C <sub>21</sub> H <sub>30</sub> O <sub>4</sub>               | 345.21 | 4.7271  | HMDB01547   |
| 6   | M-H      | 0.87    | Asparagine            | C <sub>4</sub> H <sub>8</sub> N <sub>2</sub> O <sub>3</sub>  | 131.05 | 5.9467  | HMDB33780   |
| 7   | M+H      | 2.11    | Glucose               | C <sub>6</sub> H <sub>12</sub> O <sub>6</sub>                | 181.07 | 4.9133  | HMDB00122   |
| 8   | M+H      | 2.46    | Homocysteine          | C <sub>4</sub> H <sub>9</sub> NO <sub>2</sub> S              | 136.04 | -4.2862 | HMDB00742   |
| 9   | M+H      | 1.03    | Isocitric acid        | C <sub>6</sub> H <sub>8</sub> O <sub>7</sub>                 | 215.01 | 4.7010  | HMDB00193   |
| 10  | M+H      | 0.60    | Arginine              | C <sub>6</sub> H <sub>14</sub> N <sub>4</sub> O <sub>2</sub> | 175.12 | -2.1115 | HMDB00517   |
| 11  | M-H      | 1.71    | Glutamine             | C <sub>5</sub> H <sub>10</sub> N <sub>2</sub> O <sub>3</sub> | 145.06 | -5.7520 | HMDB00641   |
| 12  | M+H      | 4.07    | Lysine                | C <sub>6</sub> H <sub>14</sub> N <sub>2</sub> O <sub>2</sub> | 147.11 | -9.2258 | HMDB00182   |
| 13  | M+H      | 6.05    | Phenylalanine         | C <sub>9</sub> H <sub>11</sub> NO <sub>2</sub>               | 166.08 | -6.2631 | HMDB00159   |
| 14  | M-H      | 0.88    | Tyrosine              | C <sub>9</sub> H <sub>11</sub> NO <sub>3</sub>               | 180.07 | 0.1284  | HMDB0000158 |
| 15  | M-H      | 0.55    | Valine                | C <sub>5</sub> H <sub>11</sub> NO <sub>2</sub>               | 116.07 | 2.0329  | HMDB00883   |
| 16  | M-H      | 6.35    | LysoPC(15:0)          | C <sub>23</sub> H <sub>48</sub> NO <sub>7</sub> P            | 480.31 | -6.6735 | HMDB10381   |
| 17  | M-H      | 8.55    | LysoPC(18:0)          | C <sub>26</sub> H <sub>54</sub> NO <sub>7</sub> P            | 522.36 | -3.7906 | HMDB10384   |
| 18  | M-H      | 7.51    | LysoPC(18:1(9Z))      | C <sub>26</sub> H <sub>52</sub> NO <sub>7</sub> P            | 520.34 | 6.3940  | HMDB02815   |
| 19  | M+H      | 7.41    | LysoPE(0:0/20:0)      | C <sub>25</sub> H <sub>52</sub> NO <sub>7</sub> P            | 510.36 | -2.3125 | HMDB11481   |
| 20  | M+H      | 8.52    | Palmitic amide        | C <sub>16</sub> H <sub>33</sub> NO                           | 256.26 | 0.6928  | HMDB12273   |
| 21  | M-H      | 5.48    | Pyruvic acid          | C <sub>3</sub> H <sub>4</sub> O <sub>3</sub>                 | 87.01  | 0.6928  | HMDB00243   |
| 22  | M+H      | 4.30    | Sphingosine           | C <sub>18</sub> H <sub>38</sub> NO <sub>5</sub> P            | 380.26 | -1.2722 | HMDB0000277 |
| 23  | M-H      | 4.29    | Taurocholic acid      | C <sub>26</sub> H <sub>45</sub> NO <sub>7</sub> S            | 514.28 | 1.7544  | HMDB00036   |
| 24  | M+H      | 1.39    | Uric acid             | C <sub>5</sub> H <sub>4</sub> N <sub>4</sub> O <sub>3</sub>  | 169.04 | -8.5142 | HMDB00289   |
| 25  | M-H      | 0.65    | Uridine               | C <sub>9</sub> H <sub>12</sub> N <sub>2</sub> O <sub>6</sub> | 243.06 | -5.7807 | HMDB00296   |
| 26  | M-H      | 0.66    | Lactic acid           | C <sub>3</sub> H <sub>6</sub> O <sub>3</sub>                 | 89.02  | 2.8609  | HMDB01311   |
| 27  | M+H      | 3.89    | Glycerophosphocholine | C <sub>8</sub> H <sub>20</sub> NO <sub>6</sub> P             | 258.11 | 0.3502  | HMDB00086   |
